# Supplementary material
Source: PubMed Central journal article supplement (PMC7654679)
Supplement: CUAJ-6-E274.pdf [file CUAJ-6-E274.pdf]

## The long-term outcomes of Gleason grade groups 2 and 3 prostate cancer managed by active surveillance: Results from a large population-based cohort

Patrick O. Richard, MD<sup>1</sup>; Narhari Timilshina, MD<sup>2</sup>; Maria Komisarenko, MD<sup>2</sup>; Lisa Martin, MD<sup>2</sup>; Ardalan Ahmad, MD<sup>2</sup>; Shabbir M.H. Alibhai, MD<sup>3</sup>; Robert J. Hamilton, MD<sup>2</sup>; Girish S. Kulkarni, MD<sup>2</sup>; Antonio Finelli, MD<sup>2</sup>

<sup>1</sup>Division of Urology, Department of Surgery, Centre Hospitalier Universitaire de Sherbrooke and the Centre de recherche du CHUS, Université de Sherbrooke, Sherbrooke, QC; <sup>2</sup>Division of Urology, Departments of Surgery and Surgical Oncology, Princess Margaret Cancer Centre, University Health Network and the University of Toronto, Toronto, ON, Canada; <sup>3</sup>Department of Medicine, University Health Network and the University of Toronto, Toronto, ON, Canada

Cite as: *Can Urol Assoc J* 2020;14(6):E274-8.

| <b>Supplementary Table 1. Ontario Health Insurance Plan (OHIP) physician billing claims used to identify prostate cancer-related management</b> |                                                                                                                                                                                                                                                                                                                                                                                                                                                                                                                                                                                                                                                                                                                      |
|-------------------------------------------------------------------------------------------------------------------------------------------------|----------------------------------------------------------------------------------------------------------------------------------------------------------------------------------------------------------------------------------------------------------------------------------------------------------------------------------------------------------------------------------------------------------------------------------------------------------------------------------------------------------------------------------------------------------------------------------------------------------------------------------------------------------------------------------------------------------------------|
| <b>Billing claims – code</b>                                                                                                                    | <b>Fee code: OHIP definition</b>                                                                                                                                                                                                                                                                                                                                                                                                                                                                                                                                                                                                                                                                                     |
| Androgen deprivation therapy                                                                                                                    | G342: implantation of hormone pellets                                                                                                                                                                                                                                                                                                                                                                                                                                                                                                                                                                                                                                                                                |
| Orchiectomy                                                                                                                                     | S589: orchiectomy; S598: radical orchiectomy                                                                                                                                                                                                                                                                                                                                                                                                                                                                                                                                                                                                                                                                         |
| Biopsy                                                                                                                                          | Z712: biopsy, needle; Z713 biopsy, needle with drainage of abscess; S644: biopsy, perineal; E780: cystoscopy with needle biopsy of prostate                                                                                                                                                                                                                                                                                                                                                                                                                                                                                                                                                                          |
| Transurethral resection of the prostate                                                                                                         | S654: transurethral resection of prostate for residual tissue; S655: transurethral resection of prostate                                                                                                                                                                                                                                                                                                                                                                                                                                                                                                                                                                                                             |
| Radical prostatectomy                                                                                                                           | S645: perineal prostatectomy; S646: perineal prostatectomy with vesiculectomy; S651: radical retropubic prostatectomy; S653: laparoscopic radical prostatectomy;                                                                                                                                                                                                                                                                                                                                                                                                                                                                                                                                                     |
| Pelvic lymph node dissection                                                                                                                    | S652: staging pelvic lymph node dissection for prostate cancer                                                                                                                                                                                                                                                                                                                                                                                                                                                                                                                                                                                                                                                       |
| Brachytherapy                                                                                                                                   | S640: stereotactic prostate brachytherapy; X322: radium (sealed sources) treatment planning dosage; X323: radium (sealed sources) Intracavit. applic. - 1st applic.; X324: radium (sealed sources) - Interstitial; X325: radium (sealed sources) Applic. plaque/mould; X334: radium (sealed sources) Intracavit. applic. - rep. applic.                                                                                                                                                                                                                                                                                                                                                                              |
| Radiotherapy                                                                                                                                    | X310: simple treatment planning; X311: intermediate treatment planning; X312: complex treatment planning; X313: full 3D treatment preparation                                                                                                                                                                                                                                                                                                                                                                                                                                                                                                                                                                        |
| Urologist visits                                                                                                                                | A355: consultation; A935: special surgical consultation; A356: repeat consultation; A353: specific assessment; A354: partial assessment; C355: in-patient consultation; C935: in-patient special surgical consultation; C356: in-patient repeat consultation; C353: in-patient specific assessment; C354: in-patient partial assessment; C352: in-patient subsequent visits – first five weeks; C357: in-patient subsequent visits – sixth to thirteenth week; C359: in-patient subsequent visit – after thirteenth week                                                                                                                                                                                             |
| Radio-oncologist visits                                                                                                                         | A340: medical specific re-assessment; A341: complex medical specific re-assessment; A343: medical specific assessment; A345: consultation; A346: repeat consultation; A348: partial assessment; A745: limited consultation; C340: in-patient medical specific re-assessment; C341: in-patient complex medical specific re-assessment; C343: in-patient medical specific assessment; C345: in-patient consultation; C346: in-patient repeat consultation; C348: in-patient partial assessment; C745: in-patient limited consultation; C352: in-patient subsequent visits – first five weeks; C357: in-patient subsequent visits – sixth to thirteenth week; C359: in-patient subsequent visit – after thirteenth week |

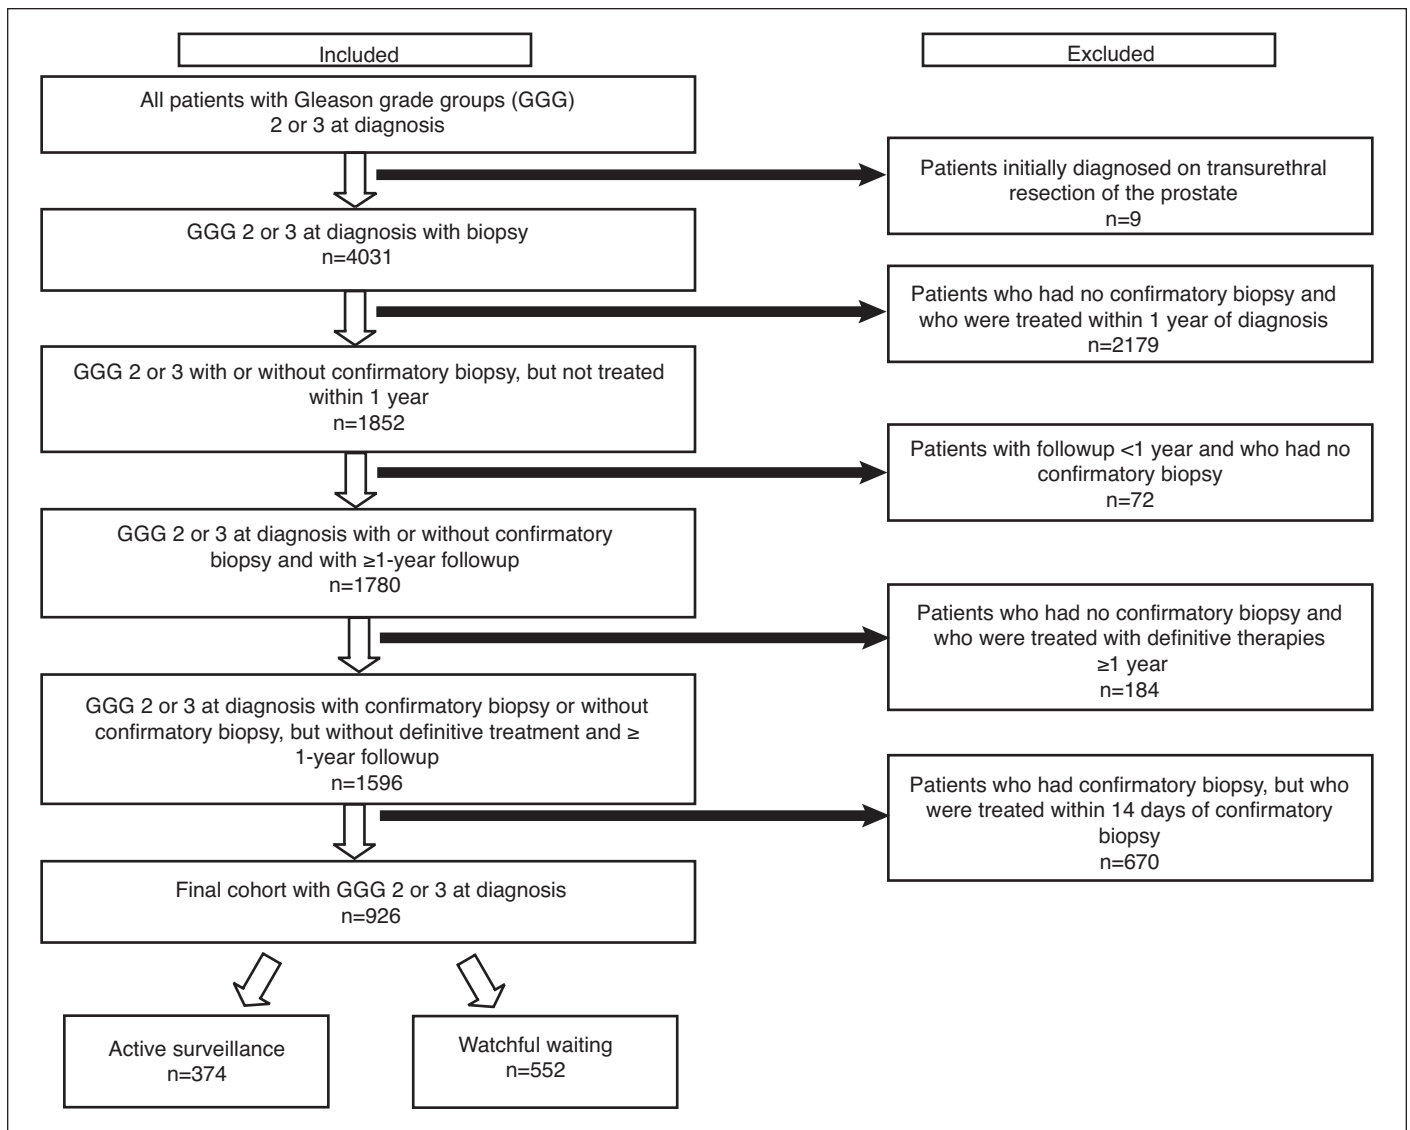

Supplementary Fig. 1. Flow chart for identification of cohort.

| <b>Supplementary Table 2. Description of covariates used in the multivariable models</b> |                                                                                |                         |                                                                       |
|------------------------------------------------------------------------------------------|--------------------------------------------------------------------------------|-------------------------|-----------------------------------------------------------------------|
| <b>Variables</b>                                                                         | <b>Definition</b>                                                              | <b>Type of variable</b> | <b>Categories</b>                                                     |
| <b>Patient-specific characteristics</b>                                                  |                                                                                |                         |                                                                       |
| Age, years                                                                               | Age at diagnosis                                                               | Continuous              | Per 10-year increment                                                 |
| Year of diagnosis                                                                        | Year of diagnosis                                                              | Categorical             | Years 2002–2004<br>Years 2005–2007<br>Years 2008–2011                 |
| ADG score                                                                                | ADG summary score                                                              | Continuous              | Per 1-unit increment                                                  |
| Area of residency                                                                        | Primary area of residency                                                      | Categorical             | Urban<br>Rural                                                        |
| Income quintile                                                                          | Neighborhood average income quintile                                           | Categorical             | 1–5, with 1 representing the lowest income quintile and 5 the highest |
| Initial management                                                                       | Type of management                                                             | Categorical             | Watchful waiting<br>Active surveillance                               |
| <b>Disease characteristics</b>                                                           |                                                                                |                         |                                                                       |
| PSA category at diagnosis                                                                | PSA level (ng/mL)                                                              | Categorical             | 0–4<br>4.01–10<br>>10<br>Missing                                      |
| Positive cores at diagnosis and confirmatory biopsy                                      | Number of positive cores at diagnosis and at confirmatory biopsy               | Categorical             | 1<br>2<br>3<br>>3<br>Missing                                          |
| Max. % of core involvement at diagnosis and confirmatory biopsy                          | Maximal percentage of core involvement at diagnosis and at confirmatory biopsy | Categorical             | ≤50%<br><50%                                                          |
| Gleason grade group at confirmatory biopsy                                               | Maximal grade group at diagnosis and at confirmatory biopsy                    | Categorical             | 2 (Gleason score 3+4)<br>3 (Gleason Score 4+3)                        |
| <b>Institution-level characteristics</b>                                                 |                                                                                |                         |                                                                       |
| Type of primary physician                                                                | Specialty of primary caregiver                                                 | Categorical             | Urologist<br>Radiation oncologist                                     |
| Physician annual prostate cancer treatment volume                                        | Annual new PCa-related consultation volume during study period – physician     | Categorical             | 1st tertile<br>2nd tertile<br>3rd tertile                             |
| Specialized cancer-center                                                                | Type of center                                                                 | Categorical             | YES – Cancer center<br>NO – Non-cancer center                         |
| Institution annual prostate cancer treatment volume                                      | Annual new PCa-related consultation volume during study period - institution   | Categorical             | 1st tertile<br>2nd tertile<br>3rd tertile                             |

| <b>Supplementary Table 3. Cancer-specific and overall survival status (watchful waiting vs. active surveillance)<sup>†</sup></b> |                            |                                     |                                        |          |
|----------------------------------------------------------------------------------------------------------------------------------|----------------------------|-------------------------------------|----------------------------------------|----------|
| <b>Variables</b>                                                                                                                 | <b>Overall<br/>(n=926)</b> | <b>Watchful waiting<br/>(n=552)</b> | <b>Active surveillance<br/>(n=374)</b> | <b>p</b> |
| Overall deaths, n (%) <sup>*</sup>                                                                                               |                            |                                     |                                        |          |
| Overall                                                                                                                          | 371 (40)                   | 300 (54)                            | 71 (19)                                | <0.001   |
| 5 years                                                                                                                          | 158 (17)                   | 136 (25)                            | 22 (6)                                 | <0.001   |
| 10 years                                                                                                                         | 341 (37)                   | 274 (50)                            | 67 (18)                                | <0.001   |
| Prostate cancer related deaths, n (%)                                                                                            |                            |                                     |                                        |          |
| Overall                                                                                                                          | 63 (7)                     | 48 (9)                              | 15 (4)                                 | 0.006    |
| 5 years                                                                                                                          | 35 (4)                     | 28 (5)                              | 7 (2)                                  | 0.01     |
| 8 years                                                                                                                          | 54 (6)                     | 41 (7)                              | 13 (4)                                 | 0.01     |
| Followup for overall survival (months), median (IQR)                                                                             | 91 (60–116)                | 84 (50–110)                         | 97 (72–121)                            | <0.001   |
| Followup for cancer-specific survival (months), median (IQR)                                                                     | 77 (49–93)                 | 74 (48–91)                          | 81 (50–95)                             | 0.12     |

<sup>†</sup>Followup data was available for overall deaths until December 31, 2014 and until December 31, 2012 for cancer-specific survival. <sup>\*</sup>If censored after December 31, 2012, there were 260 (28%) deaths identified (216 in the watchful waiting cohort; 44 in the active surveillance cohort). IQR: interquartile range.

| <b>Supplementary Table 4. Cancer-specific and overall survival status (by Gleason grade group)<sup>†</sup></b> |                    |                           |                          |       |                              |                          |       |
|----------------------------------------------------------------------------------------------------------------|--------------------|---------------------------|--------------------------|-------|------------------------------|--------------------------|-------|
| Variables                                                                                                      | Overall<br>(n=926) | Watchful waiting<br>n=552 |                          |       | Active surveillance<br>n=374 |                          |       |
|                                                                                                                |                    | Grade group 2<br>(n=361)  | Grade group 3<br>(n=191) | p     | Grade group 2<br>(n=283)     | Grade group 3<br>(n=101) | p     |
| Overall deaths, n (%)*                                                                                         |                    |                           |                          |       |                              |                          |       |
| Overall                                                                                                        | 371 (40)           | 181 (50)                  | 119 (62)                 | 0.006 | 47 (17)                      | 24 (26)                  | 0.034 |
| 5 years                                                                                                        | 158 (17)           | 81 (22)                   | 55 (29)                  | 0.099 | 15 (5)                       | 7 (8)                    | 0.39  |
| 10 years                                                                                                       | 341 (37)           | 169 (46)                  | 105 (55)                 | 0.068 | 45 (16)                      | 22 (24)                  | 0.071 |
| Followup for overall survival<br>(months), median (IQR)                                                        | 91<br>(60–116)     | 82<br>(52–110)            | 86<br>(49–115)           | 0.57  | 95<br>(71–119)               | 105<br>(72–125)          | 0.20  |
| Prostate cancer related deaths, n (%)                                                                          |                    |                           |                          |       |                              |                          |       |
| Overall                                                                                                        | 63 (7)             | 23 (6)                    | 25 (13)                  | 0.007 | 9 (3)                        | 6 (7)                    | 0.14  |
| 5 years                                                                                                        | 35 (4)             | 13 (4)                    | 15 (8)                   | 0.030 | 3 (1)                        | 4 (4)                    | 0.062 |
| 8 years                                                                                                        | 54 (6)             | 19 (5)                    | 22 (12)                  | 0.007 | 7 (3)                        | 6 (7)                    | 0.092 |
| Followup for cancer-specific survival<br>(months), median (IQR)                                                | 77<br>(49–93)      | 75<br>(48–91)             | 73<br>(45–92)            | 0.87  | 80<br>(48–93)                | 89<br>(58–96)            | 0.072 |

<sup>†</sup>Followup data was available for overall deaths until December 31, 2014 and until December 31 2012 for cancer-specific survival. \*If censored after December 31, 2012, there were 260 (28%) deaths identified (216 in the watchful waiting cohort; 44 in the active surveillance cohort). IQR: interquartile range.

| <b>Supplementary Table 5. Univariable and multivariable Cox proportional hazard model testing for factors associated with overall survival</b> |                                    |                  |                                                  |                  |
|------------------------------------------------------------------------------------------------------------------------------------------------|------------------------------------|------------------|--------------------------------------------------|------------------|
| <b>Variables</b>                                                                                                                               | <b>Univariable<br/>HR (95% CI)</b> | <b>p</b>         | <b>Multivariable<sup>†</sup><br/>HR (95% CI)</b> | <b>p</b>         |
| <b>Patient-specific characteristics</b>                                                                                                        |                                    |                  |                                                  |                  |
| Age, per 10 years increase                                                                                                                     | <b>2.38 (2.06–2.77)</b>            | <b>&lt;0.001</b> | <b>1.79 (1.49–2.14)</b>                          | <b>&lt;0.001</b> |
| Year of diagnosis                                                                                                                              |                                    |                  |                                                  |                  |
| 2002–04                                                                                                                                        | REF                                |                  | REF                                              |                  |
| 2005–07                                                                                                                                        | 0.89 (0.71–1.11)                   | 0.3              | 1.19 (0.93–1.52)                                 | 0.16             |
| 2008–11                                                                                                                                        | 0.74 (0.49–1.12)                   | 0.16             | 1.41 (0.91–2.18)                                 | 0.13             |
| ADG scores, per 1-unit increase                                                                                                                | 1.04 (1.04–1.04)                   | <0.001           | 1.03 (1.02–1.03)                                 | <0.001           |
| Area of residency (rural vs. urban)                                                                                                            | 1.23 (0.91–1.65)                   | 0.17             | 1.17 (0.85–1.60)                                 | 0.3              |
| Neighborhood Income quintile                                                                                                                   |                                    |                  |                                                  |                  |
| 1st quintile (lowest)                                                                                                                          | REF                                |                  | REF                                              |                  |
| 2nd quintile                                                                                                                                   | <b>0.71 (0.51–0.98)</b>            | <b>0.04</b>      | <b>0.68 (0.48–0.96)</b>                          | <b>0.03</b>      |
| 3rd quintile                                                                                                                                   | 0.84 (0.61–1.16)                   | 0.3              | <b>0.66 (0.48–0.92)</b>                          | <b>0.01</b>      |
| 4th quintile                                                                                                                                   | 0.78 (0.57–1.07)                   | 0.12             | <b>0.71 (0.52–0.98)</b>                          | <b>0.03</b>      |
| 5th quintile (highest)                                                                                                                         | <b>0.66 (0.49–0.91)</b>            | <b>0.009</b>     | <b>0.65 (0.47–0.91)</b>                          | <b>0.01</b>      |
| Initial management (watchful waiting vs. active surveillance)                                                                                  | <b>3.44 (2.65–4.46)</b>            | <b>&lt;0.001</b> | <b>1.92 (1.31–2.79)</b>                          | <b>&lt;0.001</b> |
| <b>Disease-specific characteristics</b>                                                                                                        |                                    |                  |                                                  |                  |
| PSA category at diagnosis (ng/mL)                                                                                                              |                                    |                  |                                                  |                  |
| 0–4                                                                                                                                            | REF                                |                  | REF                                              |                  |
| 4.01–10                                                                                                                                        | 1.56 (0.83–2.91)                   | 0.3              | 0.58 (0.30–1.13)                                 | 0.11             |
| >10                                                                                                                                            | 0.72 (0.39–1.38)                   | 0.16             | 0.82 (0.43–1.59)                                 | 0.6              |
| Missing                                                                                                                                        | 1.55 (0.84–2.85)                   | 0.16             | 1.08 (0.57–2.04)                                 | 0.8              |
| Positive cores at diagnosis                                                                                                                    |                                    |                  |                                                  |                  |
| 1                                                                                                                                              | REF                                |                  | REF                                              |                  |
| 2                                                                                                                                              | 1.12 (0.71–1.76)                   | 0.6              | 0.80 (0.50–1.28)                                 | 0.4              |
| 3                                                                                                                                              | 1.49 (0.96–2.32)                   | 0.08             | 1.15 (0.72–1.83)                                 | 0.6              |
| >3                                                                                                                                             | <b>1.79 (1.22–2.63)</b>            | <b>0.003</b>     | 1.13 (0.76–1.70)                                 | 0.5              |
| Missing                                                                                                                                        | <b>1.94 (1.26–2.97)</b>            | <b>0.003</b>     | 0.95 (0.59–1.55)                                 | 0.9              |
| Max. % of core involvement at diagnosis (>50% vs. ≤50%)                                                                                        | 1.26 (0.98–1.63)                   | 0.07             | 1.03 (0.78–1.37)                                 | 0.8              |
| Gleason grade group at diagnosis (3 vs. 2)                                                                                                     | <b>1.37 (1.12–1.69)</b>            | <b>0.003</b>     | 1.03 (0.83–1.28)                                 | 0.8              |
| Definitive treatment (yes vs. no)                                                                                                              | <b>0.23 (0.16–0.33)</b>            | <b>&lt;0.001</b> | 1.37 (0.84–2.49)                                 | 0.2              |
| <b>Prostate cancer treatment-specific characteristics)</b>                                                                                     |                                    |                  |                                                  |                  |
| Primary physician (urologist vs radiation oncologist)                                                                                          | 1.22 (0.87–1.71)                   | 0.3              | <b>0.48 (0.29–0.76)</b>                          | <b>0.002</b>     |
| Physician annual prostate cancer treatment volume                                                                                              |                                    |                  |                                                  |                  |
| 1st tertile (lowest)                                                                                                                           | REF                                |                  | REF                                              |                  |
| 2nd tertile                                                                                                                                    | 1.07 (0.68–1.65)                   | 0.6              | 1.00 (0.64–1.60)                                 | 0.9              |
| 3rd tertile (highest)                                                                                                                          | 1.01 (0.67–1.51)                   | 0.7              | 0.89 (0.58–1.43)                                 | 0.6              |
| Specialized cancer center (yes vs. no)                                                                                                         | <b>0.55 (0.43–0.70)</b>            | <b>&lt;0.001</b> | 0.79 (0.54–1.14)                                 | 0.20             |
| Institution annual prostate cancer treatment volume                                                                                            |                                    |                  |                                                  |                  |
| 1st tertile (lowest)                                                                                                                           | REF                                |                  | REF                                              |                  |
| 2nd tertile                                                                                                                                    | 0.77 (0.49–1.19)                   | 0.2              | 0.83 (0.52–1.44)                                 | 0.5              |
| 3rd tertile (highest)                                                                                                                          | 0.73 (0.49–1.09)                   | 0.12             | 0.82 (0.51–1.31)                                 | 0.4              |

<sup>†</sup>All variables were fit in final multivariable model. ADG: aggregated diagnosis groups; CI: confidence interval; HR: hazard ratio; PSA: prostate-specific antigen.

| <b>Supplementary Table 6. Grade group on radical prostatectomy specimen (n=119)</b> |     |                              |                              |                 |
|-------------------------------------------------------------------------------------|-----|------------------------------|------------------------------|-----------------|
|                                                                                     |     | <b>Diagnostic biopsy</b>     |                              |                 |
|                                                                                     |     | Gleason grade group 2 (n=94) | Gleason grade group 3 (n=25) | Overall (n=119) |
| Radical prostatectomy Gleason grade groups, n (%)                                   | N/A | 0 (0)                        | 3 (12.0)                     | 3 (2.9)         |
|                                                                                     | 1   | 12 (12.8)                    | 3 (12.0)                     | 15 (12.5)       |
|                                                                                     | 2   | 62 (66.0)                    | 10 (25.0)                    | 72 (60.5)       |
|                                                                                     | 3   | 19 (20.2)                    | 7 (28.0)                     | 26 (21.8)       |
|                                                                                     | 4   | 1 (1.1)                      | 0 (0)                        | 1 (0.8)         |
|                                                                                     | 5   | 0 (0)                        | 2 (8.0)                      | 2 (1.7)         |
